# Supplementary material
Source: HighWire-hosted journal article supplement (https://bmjopen.bmj.com/content/9/5/e025715)
Supplement: inline-supplementary-material-2 [file inline-supplementary-material-2.pdf]

# Supplementary Tables

**Supplementary Table 1: Unweighted distribution of study children according to background characteristics (N=2,533)**

| Variables                                    | Total<br>(n= 2,533) |                     | Normal Birth Weight<br>(n=2,167) |                     | Low Birth Weight<br>(n=366) |                     |
|----------------------------------------------|---------------------|---------------------|----------------------------------|---------------------|-----------------------------|---------------------|
|                                              | Frequency           | Percentage<br>(%) * | Frequency                        | Percentage<br>(%) * | Frequency                   | Percentage<br>(%) * |
| <b>Maternal age (years)</b>                  |                     |                     |                                  |                     |                             |                     |
| ≤20                                          | 315                 | 12.4                | 276                              | 12.7                | 39                          | 10.7                |
| 21-34                                        | 1,859               | 73.4                | 1,573                            | 72.6                | 286                         | 78.1                |
| 35-49                                        | 359                 | 14.2                | 318                              | 14.7                | 41                          | 11.2                |
| <b>Sex of child</b>                          |                     |                     |                                  |                     |                             |                     |
| Male                                         | 1,388               | 54.8                | 1,213                            | 56.0                | 175                         | 47.8                |
| Female                                       | 1,145               | 45.2                | 954                              | 44.0                | 191                         | 52.2                |
| <b>Maternal education</b>                    |                     |                     |                                  |                     |                             |                     |
| No Education                                 | 1,740               | 68.7                | 1,473                            | 68.0                | 267                         | 73.0                |
| Primary                                      | 307                 | 12.1                | 269                              | 12.4                | 38                          | 10.4                |
| Secondary or above                           | 486                 | 19.2                | 425                              | 19.6                | 61                          | 16.7                |
| <b>Maternal occupation</b>                   |                     |                     |                                  |                     |                             |                     |
| Not Working                                  | 2,284               | 90.2                | 1,946                            | 89.8                | 338                         | 92.3                |
| Working                                      | 249                 | 9.8                 | 221                              | 10.2                | 28                          | 7.7                 |
| <b>Preceding birth interval<br/>(months)</b> |                     |                     |                                  |                     |                             |                     |
| First Birth                                  | 526                 | 20.8                | 453                              | 20.9                | 73                          | 19.9                |

|                             |       |      |       |      |     |      |
|-----------------------------|-------|------|-------|------|-----|------|
| <24                         | 538   | 21.2 | 450   | 20.8 | 88  | 24.0 |
| 24-47                       | 1,038 | 41.0 | 883   | 40.7 | 155 | 42.3 |
| ≥ 48                        | 431   | 17.0 | 381   | 17.6 | 50  | 13.7 |
| <b>Parity</b>               |       |      |       |      |     |      |
| Primipara (1)               | 526   | 20.8 | 453   | 20.9 | 73  | 19.9 |
| Multipara (2-4)             | 1,090 | 43.0 | 915   | 42.2 | 175 | 47.8 |
| Grand Multipara (≥5)        | 917   | 36.2 | 799   | 36.9 | 118 | 32.3 |
| <b>Took iron pill</b>       |       |      |       |      |     |      |
| Yes                         | 1,703 | 67.2 | 1,448 | 66.8 | 255 | 69.7 |
| No                          | 830   | 32.8 | 719   | 33.2 | 111 | 30.3 |
| <b>Number of ANC visits</b> |       |      |       |      |     |      |
| No (0)                      | 381   | 15.0 | 327   | 15.1 | 54  | 14.8 |
| Inadequate (1-3)            | 1,138 | 44.9 | 976   | 45.0 | 162 | 44.2 |
| Adequate (4 or More)        | 1,014 | 40.0 | 864   | 39.9 | 150 | 41.0 |
| <b>Wealth status</b>        |       |      |       |      |     |      |
| Poorest                     | 272   | 10.7 | 206   | 9.5  | 66  | 18.0 |
| Poorer                      | 383   | 15.1 | 311   | 14.4 | 72  | 19.7 |
| Middle                      | 450   | 17.8 | 390   | 18.0 | 60  | 16.4 |
| Richer                      | 662   | 26.1 | 582   | 26.9 | 80  | 21.9 |
| Richest                     | 766   | 30.2 | 678   | 31.2 | 88  | 24.0 |
| <b>Place of residence</b>   |       |      |       |      |     |      |
| Urban                       | 996   | 39.3 | 846   | 39.0 | 150 | 41.0 |
| Rural                       | 1,537 | 60.7 | 1,321 | 61.0 | 216 | 59.0 |
| <b>Region of residence</b>  |       |      |       |      |     |      |
| North Eastern               | 396   | 15.6 | 332   | 15.3 | 64  | 17.5 |

|                  |     |      |     |      |     |      |
|------------------|-----|------|-----|------|-----|------|
| North Western    | 364 | 14.4 | 325 | 15.0 | 39  | 10.7 |
| Central East     | 244 | 9.6  | 225 | 10.4 | 19  | 5.2  |
| Central          | 734 | 29.0 | 612 | 28.2 | 122 | 33.3 |
| Central Western  | 282 | 11.1 | 232 | 10.7 | 50  | 13.7 |
| Southern Eastern | 343 | 13.5 | 298 | 13.8 | 45  | 12.3 |
| Southern Western | 170 | 6.7  | 143 | 6.6  | 27  | 7.4  |

*ANC: Antenatal Care, \* Column Percentage*

**Supplementary Table 2:** Bivariate and multivariable logistic regression (excluding the sex of the child) to identify factors influencing low birth weight in Afghanistan

| <b>Variables</b>                         | <b>COR (95% CI)</b>         | <b>AOR (95% CI)<sup>2</sup></b> |
|------------------------------------------|-----------------------------|---------------------------------|
| <b>Maternal age (years)</b>              |                             |                                 |
| ≤20                                      | Ref.                        |                                 |
| 21-34                                    | 1.6 (0.8- 3.3)              |                                 |
| 35-49                                    | 0.8 (0.3- 2.0)              |                                 |
| <b>Maternal education</b>                |                             |                                 |
| No Education                             | Ref.                        | Ref.                            |
| Primary                                  | 0.7 <sup>1</sup> (0.4- 1.0) | 0.5** (0.3-0.8)                 |
| Secondary or above                       | 0.6 (0.2 - 1.4)             | 0.4 (0.1-1.0)                   |
| <b>Maternal occupation</b>               |                             |                                 |
| Not Working                              | Ref.                        |                                 |
| Working                                  | 0.8 (0.3- 2.0)              |                                 |
| <b>Preceding birth interval (months)</b> |                             |                                 |
| First Birth                              | Ref.                        | Ref.                            |
| <24                                      | 0.8 (0.4- 1.7)              | 0.8 (0.3-1.8)                   |
| 24-47                                    | 0.9 (0.5- 1.6)              | 0.8 (0.5-1.4)                   |
| ≥ 48                                     | 0.5* (0.2- 0.9)             | 0.3* (0.1-0.8)                  |
| <b>Parity</b>                            |                             |                                 |
| Primipara                                | Ref.                        |                                 |
| Multipara                                | 0.8 (0.5-1.3)               |                                 |
| Grand multipara                          | 0.8 (0.4-1.6)               |                                 |
| <b>Took iron pill</b>                    |                             |                                 |
| Yes                                      | Ref.                        | Ref.                            |

|                             |                             |                  |
|-----------------------------|-----------------------------|------------------|
| No                          | 0.7 <sup>1</sup> (0.4- 1.1) | 0.8 (0.5-1.3)    |
| <b>Number of ANC visits</b> |                             |                  |
| No visit (0)                | Ref.                        | Ref.             |
| Inadequate (1-3)            | 1.7 (0.5- 5.3)              | 2.3 (0.6-9.1)    |
| Adequate (4 or More)        | 1.6 <sup>1</sup> (0.8- 3.2) | 2.0 (0.8-5.3)    |
| <b>Wealth status</b>        |                             |                  |
| Poorest                     | Ref.                        | Ref.             |
| Poorer                      | 0.6 (0.3- 1.2)              | 0.5 (0.2-1.1)    |
| Middle                      | 0.6 (0.3- 1.2)              | 0.5* (0.2-0.9)   |
| Richer                      | 0.5 <sup>1</sup> (0.2- 1.0) | 0.3** (0.1-0.6)  |
| Richest                     | 0.8 (0.3- 1.9)              | 0.3** (0.1-0.6)  |
| <b>Place of residence</b>   |                             |                  |
| Urban                       | Ref.                        | Ref.             |
| Rural                       | 0.6 <sup>1</sup> (0.3-1.0)  | 0.3*** (0.1-0.6) |
| <b>Region of residence</b>  |                             |                  |
| North Eastern               | Ref.                        | Ref.             |
| North Western               | 0.9 (0.5- 1.6)              | 0.8 (0.5-1.6)    |
| Central East                | 0.8 (0.4- 1.7)              | 0.9 (0.5-1.8)    |
| Central                     | 2.5** (1.3- 5.1)            | 3.1** (1.6-6.2)  |
| Central Western             | 2.3** (1.2- 4.4)            | 2.7** (1.4-5.2)  |
| Southern Eastern            | 1.4 <sup>1</sup> (0.9- 2.3) | 1.7 (0.9-3.1)    |
| Southern Western            | 1.8 <sup>1</sup> (1.0- 3.2) | 3.9** (1.4-5.2)  |

1.  $p < 0.2$ , \*  $p < 0.05$ , \*\*  $p < 0.01$ , \*\*\*  $p < 0.001$ , ANC: Antenatal care, AOR: Adjusted odds ratio, CI: Confidence interval, COR: Crude odds ratio.

2. Variable with  $p$ -value less than  $<0.2$  from unadjusted model were included into multivariable analysis

**Supplementary Table 3:** Bivariate and multivariable logistic regression to identify factors influencing low birth weight in Afghan male child

| <b>Variables</b>                         | <b>COR (95% CI)</b>        | <b>AOR (95% CI)<sup>2</sup></b> |
|------------------------------------------|----------------------------|---------------------------------|
| <b>Maternal age (years)</b>              |                            |                                 |
| ≤20                                      | Ref.                       |                                 |
| 21-34                                    | 1.5 (0.6-3.5)              |                                 |
| 35-49                                    | 0.6 (0.1-2.8)              |                                 |
| <b>Maternal education</b>                |                            |                                 |
| No Education                             | Ref.                       | Ref.                            |
| Primary                                  | 2.4 <sup>1</sup> (0.9-6.7) | 0.4 (0.1-1.1)                   |
| Secondary or above                       | 4.7** (1.5-13.1)           | 0.2** (0.1-0.5)                 |
| <b>Maternal occupation</b>               |                            |                                 |
| Not Working                              | Ref.                       |                                 |
| Working                                  | 0.8 (0.3-2.0)              |                                 |
| <b>Preceding birth interval (months)</b> |                            |                                 |
| First Birth                              | Ref.                       | Ref.                            |
| <24                                      | 2.1 <sup>1</sup> (0.8-5.8) | 0.7 (0.4-1.4)                   |
| 24-47                                    | 1.4 (0.4-5.0)              | 1.1 (0.6-2.2)                   |
| ≥ 48                                     | 1.3 (0.4-4.2)              | 0.4 (0.1-1.2)                   |
| <b>Parity</b>                            |                            |                                 |
| Primipara                                | Ref.                       |                                 |
| Multipara                                | 1.3 (0.6-2.8)              |                                 |
| Grand multipara                          | 1.2 (0.5-2.8)              |                                 |
| <b>Took iron pill</b>                    |                            |                                 |
| Yes                                      | Ref.                       | Ref.                            |

|                             |                            |                  |
|-----------------------------|----------------------------|------------------|
| No                          | 1.1 (0.5-2.5)              | 1.1 (0.5-2.8)    |
| <b>Number of ANC visits</b> |                            |                  |
| No visit (0)                | Ref.                       | Ref.             |
| Inadequate (1-3)            | 0.6 (0.2-1.8)              | 0.8 (0.2-2.4)    |
| Adequate (4 or More)        | 0.6 <sup>1</sup> (0.3-1.2) | 0.7 (0.3-1.9)    |
| <b>Wealth status</b>        |                            |                  |
| Poorest                     | Ref.                       | Ref.             |
| Poorer                      | 0.9 (0.3-3.0)              | 0.4* (0.1-0.9)   |
| Middle                      | 0.6 (0.2-1.5)              | 0.2*** (0.0-0.4) |
| Richer                      | 1.2 (0.5-2.9)              | 0.1*** (0.0-0.3) |
| Richest                     | 2.3 <sup>1</sup> (0.8-6.7) | 0.1*** (0.0-0.3) |
| <b>Place of residence</b>   |                            |                  |
| Urban                       | Ref.                       | Ref.             |
| Rural                       | 0.6 <sup>1</sup> (0.3-1.2) | 0.2*** (0.1-0.4) |
| <b>Region of residence</b>  |                            |                  |
| North Eastern               | Ref.                       | Ref.             |
| North Western               | 0.6 (0.3-1.6)              | 0.7 (0.2-1.8)    |
| Central East                | 0.7 (0.2-2.5)              | 1.0 (0.3-3.6)    |
| Central                     | 2.6* (1.1-6.4)             | 4.5** (1.6-12.4) |
| Central Western             | 2.6 <sup>1</sup> (0.9-6.4) | 3.6* (1.3-10.6)  |
| Southern Eastern            | 2.5* (1.2-5.2)             | 3.9** (1.5-10.0) |
| Southern Western            | 1.7 (0.6-5.0)              | 3.1 (0.8-11.7)   |

1.  $p < 0.2$ , \*  $p < 0.05$ , \*\*  $p < 0.01$ , \*\*\*  $p < 0.001$ , ANC: Antenatal care, AOR: Adjusted odds ratio, CI: Confidence interval, COR: Crude odds ratio.

2. Variable with  $p$ -value less than  $<0.2$  from unadjusted model were included into multivariable analysis

**Supplementary Table 4:** Bivariate and multivariable logistic regression to identify factors influencing low birth weight in Afghan female child

| Variables                                | COR (95% CI)               | AOR (95% CI) <sup>2</sup> |
|------------------------------------------|----------------------------|---------------------------|
| <b>Maternal age (years)</b>              |                            |                           |
| ≤20                                      | Ref.                       |                           |
| 21-34                                    | 1.5 (0.6-4.1)              |                           |
| 35-49                                    | 0.9 (0.3-2.7)              |                           |
| <b>Maternal education</b>                |                            |                           |
| No Education                             | Ref.                       |                           |
| Primary                                  | 0.8 (0.2-3.9)              |                           |
| Secondary or above                       | 1.1 (0.4-3.5)              |                           |
| <b>Maternal occupation</b>               |                            |                           |
| Not Working                              | Ref.                       |                           |
| Working                                  | 0.8 (0.1-4.2)              |                           |
| <b>Preceding birth interval (months)</b> |                            |                           |
| First Birth                              | Ref.                       | Ref.                      |
| <24                                      | 2.0 <sup>1</sup> (0.8-5.2) | 0.9 (0.4-2.4)             |
| 24-47                                    | 2.2 <sup>1</sup> (0.9-5.3) | 0.7 (0.3-1.3)             |
| ≥ 48                                     | 3.4** (1.4-8.3)            | 0.3** (0.1-0.8)           |
| <b>Parity</b>                            |                            |                           |
| Primipara                                | Ref.                       |                           |
| Multipara                                | 0.5 (0.3-1.1)              |                           |
| Grand multipara                          | 0.6 (0.2-1.4)              |                           |
| <b>Took iron pill</b>                    |                            |                           |



|                             |                            |                  |
|-----------------------------|----------------------------|------------------|
| Yes                         | Ref.                       | Ref.             |
| No                          | 0.4*** (0.3-0.6)           | 0.6* (0.4-0.9)   |
| <b>Number of ANC visits</b> |                            |                  |
| No visit (0)                | Ref.                       | Ref.             |
| Inadequate (1-3)            | 7.0** (2.0-24.5)           | 7.7* (1.6-36.0)  |
| Adequate (4 or More)        | 6.7*** (2.7-16.7)          | 5.7** (1.9-17.1) |
| <b>Wealth status</b>        |                            |                  |
| Poorest                     | Ref.                       | Ref.             |
| Poorer                      | 0.5 <sup>1</sup> (0.2-1.2) | 0.6 (0.2-1.6)    |
| Middle                      | 0.9 (0.3-2.5)              | 1.0 (0.4-2.6)    |
| Richer                      | 0.5 <sup>1</sup> (0.2-1.3) | 0.6 (0.3-1.3)    |
| Richest                     | 0.4 (0.3-1.9)              | 0.5 (0.2-1.7)    |
| <b>Place of residence</b>   |                            |                  |
| Urban                       | Ref.                       | Ref.             |
| Rural                       | 0.5 <sup>1</sup> (0.3-1.1) | 0.5 (0.2-1.0)    |
| <b>Region of residence</b>  |                            |                  |
| North Eastern               | Ref.                       | Ref.             |
| North Western               | 1.2 (0.5-2.6)              | 1.1 (0.5-2.5)    |
| Central East                | 1.0 (0.4-2.2)              | 0.8 (0.3-2.0)    |
| Central                     | 2.6* (1.1-6.4)             | 2.8** (1.2-6.2)  |
| Central Western             | 2.4* (1.2-4.8)             | 2.8** (1.4-5.8)  |
| Southern Eastern            | 0.8 (0.3-1.7)              | 0. (0.4-2.2)     |
| Southern Western            | 1.8 <sup>1</sup> (0.8-4.0) | 4.0** (1.4-11.5) |

1.  $p < 0.2$ , \*  $p < 0.05$ , \*\*  $p < 0.01$ , \*\*\*  $p < 0.001$ , ANC: Antenatal care, AOR: Adjusted odds ratio, CI:

Confidence interval, COR: Crude odds ratio.

*2. Variable with p-value less than  $<0.2$  from unadjusted model were included into multivariable analysis*
